# Supplementary material
Source: publisher site journal article supplement (https://www.dovepress.com/article/603150)
Supplement: Supplementary file 1 [file 603150%20Revised%20Table%20S1-S3.docx]

**Supplementary Material**

**Table S1. Quality assessment of the included studies using the NIH Study Quality Assessment Tool for Case Series Studies.**

| **Included study** | **Q1** | **Q2** | **Q3** | **Q4** | **Q5** | **Q6** | **Q7** | **Q8** | **Q9** | **Overall rating** |
| --- | --- | --- | --- | --- | --- | --- | --- | --- | --- | --- |
| T. Kovacevic13 | Yes | Yes | CD | Yes | Yes | Yes | Yes | Yes | Yes | Fair |
| Wang15 | Yes | Yes | CD | Yes | Yes | Yes | Yes | Yes | Yes | Good |
| Dinh H. Vu10 | Yes | Yes | CD | Yes | Yes | Yes | Yes | Yes | Yes | Good |
| Bang JY14 | Yes | Yes | CD | Yes | Yes | Yes | Yes | Yes | Yes | Good |
| Roberts11 | Yes | Yes | CD | Yes | Yes | Yes | Yes | Yes | Yes | Good |
| Medellín-Garibay 9 | Yes | Yes | CD | Yes | Yes | Yes | Yes | Yes | Yes | Good |
| Escobar L8 | Yes | Yes | CD | Yes | Yes | Yes | Yes | Yes | Yes | Fair |
| Udy AA12 | Yes | Yes | CD | Yes | Yes | Yes | Yes | Yes | Yes | Fair |
| Revilla18 | Yes | Yes | CD | Yes | Yes | Yes | Yes | Yes | Yes | Good |
| Donadello21 | Yes | Yes | Yes | Yes | Yes | Yes | Yes | Yes | Yes | Good |
| Jalusic27 | Yes | Yes | CD | Yes | Yes | Yes | Yes | Yes | Yes | Good |
| Yu26 | Yes | Yes | CD | Yes | Yes | Yes | Yes | Yes | Yes | Good |

Q1, Was the study question or objective clearly stated?

Q2, Was the study population clearly and fully described, including a case definition?

Q3, Were the cases consecutive?

Q4, Were the subjects comparable?

Q5, Was the intervention clearly described?

Q6, Were the outcome measures clearly defined, valid, reliable, and implemented consistently across all study participants?

Q7, Was the length of follow-up adequate?

Q8, Were the statistical methods well-described?

Q9, Were the results well-described?

Response options: Yes, No, Cannot Determine (CD), Not Reported (NR), or Not Applicable (NA).

Overall rating: Studies were judged as good, fair, or poor according to the overall methodological quality of the publication; this overall rating was based on qualitative judgment rather than a simple arithmetic sum of item responses.

Note: Because the included studies were observational population pharmacokinetic analyses rather than randomized comparative trials, the NIH Study Quality Assessment Tool for Case Series Studies was applied as a pragmatic framework. Items not directly applicable to population pharmacokinetic model-development studies were recorded as NA where appropriate.

**Table S2. Verified predefined covariate contrasts used for modeled relative intervals of clearance-related covariates.**

| **Study** | **Covariate shown in Figure 2** | **Covariate type** | **Population note** | **Reference contrast** | **Lower contrast** | **Upper contrast** | **Relative interval shown** |
| --- | --- | --- | --- | --- | --- | --- | --- |
| T. Kovacevic13 | CrCl | Continuous | General ICU adults | 90 mL/min | 30 mL/min | 120 mL/min | 0.65–1.18 |
| Roberts11 | CrCl | Continuous | General ICU adults | 90 mL/min | 30 mL/min | 120 mL/min | 0.33–1.33 |
| Medellín-Garibay9 | CrCl | Continuous | General ICU adults | 90 mL/min | 30 mL/min | 120 mL/min | 0.36–1.31 |
| Medellín-Garibay9 | MV | Binary categorical | General ICU adults | No mechanical ventilation | Mechanical ventilation present | — | 0.80–1.00 |
| Yu26 | 24-h UV | Continuous | Critically ill adults receiving CRRT | 160 mL/day | 0 mL/day | 780 mL/day | 0.45–1.54 |
| Wang15 | Weight | Continuous | ICU patients receiving CRRT | 70 kg | 50 kg | 100 kg | 0.76–1.33 |
| Bang JY14 | Age | Categorical branch contrast | Critically ill adults | Age <65 years at study-typical weight 62.9 kg | Age ≥65 years at 62.9 kg | — | 0.69–1.00 |
| Revilla18 | CrCl | Continuous | ICU model-development cohort | 90 mL/min | 30 mL/min | 120 mL/min | 0.34–1.33 |
| Escobar L8 | HVHF intensity | Continuous | Refractory septic shock with HVHF | 100 mL/kg/h | 69 mL/kg/h | 123 mL/kg/h | 0.69–1.23 |
| Donadello21 | CRRT status | Binary categorical | ECMO/non-ECMO matched cohort | No CRRT assumed reference | CRRT present | — | 0.60–1.00 |
| Jalusic27 | CrCl | Continuous | Neurocritical care ventriculitis population | 152 mL/min/1.73 m² | 109 mL/min/1.73 m² | 174 mL/min/1.73 m² | 0.87–1.06 |

Notes: The horizontal intervals in Figure 2 represent modeled relative changes associated with these predefined covariate contrasts rather than statistical confidence intervals. For binary covariates, the contrast is shown as reference versus comparison state rather than low versus high numeric values.

**Table S3. Verified predefined covariate contrasts used for modeled relative intervals of distribution-related covariates in Figure 3.**

| **Study** | **Covariate shown in Figure 3** | **Covariate type** | **Population note** | **Reference contrast** | **Lower contrast** | **Upper contrast** | **Relative interval shown** |
| --- | --- | --- | --- | --- | --- | --- | --- |
| T. Kovacevic13 | Weight | Continuous | General ICU adults | 70 kg | 50 kg | 100 kg | 0.71–1.43 |
| Roberts11 | TBW | Continuous | General ICU adults | 70 kg | 50 kg | 100 kg | 0.71–1.43 |
| Medellín-Garibay9 | TBW | Continuous | General ICU adults | 70 kg | 50 kg | 100 kg | 0.71–1.43 |
| Bang JY14 | IBW → V1 | Continuous | Critically ill adults | 59 kg | 45 kg | 75 kg | 0.95–1.05 |

Notes: For each study, the typical distribution-related parameter value was normalized to 1.0, and the horizontal interval represents the modeled relative change associated with the predefined covariate contrast within that study rather than a statistical confidence interval. The current main panel focuses on the most directly comparable body-size-related covariates retained across the included models.
